# Supplementary material for: The experience of recalled trauma during psychedelic experiences and perceived links to subsequent extended difficulties: A mixed-methods study
Source: Research Square preprint supplement (doi:10.21203/rs.3.rs-7255362/v1), 2025-08-21
Supplement: Supplementary file 1 [file 2b9d0fd70f6919d7925e9c29.docx]

**Interview Guide: Trauma and Psychedelic Experiences**

Interviewers: G. Simon, N. Tadmor

**Estimated Duration:** 60–90 minutes
**Format:** Semi-structured narrative interview conducted via secure video call
**Note to Interviewer:** Encourage depth using open-ended prompts. Follow the participant’s lead while ensuring the main topics are covered. Use empathetic listening throughout. Pause or ground the participant if signs of distress emerge. Offer debriefing and support resources post-interview. Start by reading the Informed consent form and telling a bit about yourself, the study, and its scope.

**Section 1: Introduction and Contextual Background (~15–20 minutes)**

1. Can you tell me a bit about yourself and what drew you to participate in this study?
2. When and how did you first become interested in psychedelics?
3. What were your initial expectations or intentions before trying psychedelics?
4. Can you describe your first psychedelic experience?
5. Do you currently use psychedelics? If so, how often, in what contexts, and with whom?

**Section 2: Narrative of the Challenging Psychedelic Experience (~25–30 minutes)**

1. Can you tell me about the psychedelic experience you identified as particularly challenging?
   - When did it happen?
   - Where were you?
   - What substance(s) did you take, and in what dosage or form?
   - Who was present?
2. Please describe what happened during the experience—what you saw, felt, and thought.
   - What made the experience challenging?
   - Were there specific moments or phases that stood out?
3. Did any distressing or traumatic memories come up during the experience?
   - Can you describe what it was like when that memory or feeling emerged?
   - Did you recognize it at the time as related to past trauma, or only in retrospect?
4. How did you cope during the experience?
   - Did you feel supported by others, or were you alone in managing it?
   - What helped you get through it, if anything?
5. How did you make sense of the experience afterward?
   - Did you talk to anyone about it? Seek therapy or other support?

**Section 3: Trauma History and Psychedelic Confrontation (~20–25 minutes)**

1. You mentioned in the questionnaire that you had a traumatic experience prior to the psychedelic trip.
   - Can you tell me about that experience, in as much detail as you feel comfortable?
2. Before the psychedelic experience, had you ever talked about or processed this trauma?
   - Did you engage in any therapy or healing practices before the trip?
3. During the psychedelic experience, did the trauma resurface or take on a new form?
   - What was that moment like, emotionally and physically?
   - Were there images, sensations, or insights that stood out?
4. Do you think your past trauma shaped how you experienced or responded to the psychedelic journey?
   - In what ways did your coping strategies reflect your prior experiences?
5. How has the psychedelic experience influenced your relationship with the trauma now?
   - Has anything shifted in how you remember, feel about, or live with that trauma?

**Section 4: Integration, Impact, and Meaning-Making (~15–20 minutes)**

1. What insights or realizations have emerged from your psychedelic experiences?
   - Were any of them surprising or unexpected?
2. How have these experiences affected your emotional or psychological well-being, both shortly after and over time?
3. Have your relationships with others changed as a result—family, friends, partners?
4. Were there any long-term difficulties or adverse effects?
   - How did you deal with them?
5. Did the experience shift your spiritual outlook or sense of meaning?
6. Looking back, how would you describe the role of this challenging experience in your life?
7. Is there anything else you would like to share about psychedelics, trauma, or healing?

**Closing Procedures**

- Check in with the participant’s current emotional state.
- Offer grounding if needed (e.g., slow breathing, body awareness).
- Provide debriefing, including time for the participant to reflect or ask questions.
- Share information about support resources or integration referrals.
- Reaffirm confidentiality and thank them for their contribution.
