# Supplementary material for: The experience of recalled trauma during psychedelic experiences and perceived links to subsequent extended difficulties: A mixed-methods study
Source: Research Square preprint supplement (doi:10.21203/rs.3.rs-7255362/v1), 2025-08-21
Supplement: Supplementary file 2 [file 54395e0ecc8fe57a05a7a166.docx]

**Challenging Psychedelic Experiences - Questionnaire**

**Section 1: Demographics**

1. **What is your gender?**
   - Male
   - Female
   - Other
   - Prefer not to answer
2. **What is your age?**
   - 18–24
   - 25–34
   - 35–44
   - 45–55
   - Over 55
   - Prefer not to answer
3. **What is your ethnic background?**
   - Asian
   - Black
   - White
   - Hispanic
   - Mixed race
   - Other
   - Prefer not to answer
4. **What’s your highest level of education?**
   - High school / secondary school
   - Bachelor’s degree
   - Master’s degree
   - PhD or above
   - Other
   - Prefer not to answer

**Section 2: Psychedelic Experience**

1. **When did this psychedelic experience happen?**
   - Within the past 3 days
   - Within the past month
   - Within the past 3 months
   - Within the past 6 months
   - Within the past year
   - 1–3 years ago
   - More than 3 years ago
2. **What substance(s) did you take?** *(select all that apply)*
   - Ayahuasca
   - DMT
   - LSD
   - Mescaline / Peyote / San Pedro
   - Psilocybin / Magic Mushrooms
   - Ketamine
   - MDMA
   - Salvia
   - Cannabis
   - Other (please specify)
3. **Did you or someone else present know the dose you were taking?**
   - Yes
   - No
4. **Where did this psychedelic experience happen?** *(select one)*
   - On my own
   - With a friend, partner, or group of friends
   - At a party
   - At a rave, nightclub or festival
   - In a group ceremony
   - On a psychedelic retreat
   - At an underground psychedelic therapy session
   - At a clinic or medical trial
   - Other (please specify)
5. **How challenging was the psychedelic experience itself?**
   *(scale from 0 = Not at all challenging to 4 = Extremely challenging)*
   - 0
   - 1
   - 2
   - 3
   - 4

**Section 3: Difficulties and Impact**

1. **Which of the following best describe the difficulties/challenges you experienced after your psychedelic trip?***(select all that apply)*

- Emotional difficulties (e.g., emotional regulation)
- Self-perception difficulties (e.g., understanding yourself)
- Cognitive difficulties (e.g., how you thought about things)
- Social difficulties (e.g., how you related to others)
- Ontological difficulties (e.g., understanding of reality or existence)
- Spiritual difficulties (e.g., your spiritual beliefs)
- Perceptual difficulties (e.g., how your vision/hearing functioned)
- Other difficulties (please describe briefly)

1. **How long did the difficulties/challenges last after the trip?**

- Less than a week
- Up to a week
- Up to a month
- Up to 3 months
- Up to 6 months
- Up to a year
- 1–3 years
- More than 3 years

1. **To what extent do you agree with the following statement:**
   *“The difficulties that this experience caused still affect me negatively.”*

- Strongly Disagree
- Disagree
- Agree
- Strongly Agree

1. **Do you still take psychedelic drugs?**

- Yes
- No

**Section 4: Mental Health History**

1. **Had you been diagnosed with a mental illness prior to the psychedelic experience?**

- Yes
- No

1. **Do you think this prior diagnosis may be linked to the difficulties you experienced during or after the psychedelic experience?**

- Yes
- No
- Not sure

1. **Was there a traumatic experience in your childhood or youth which you think may have played a role in the difficulties that arose during or after the psychedelic experience?**

- Yes
- No
- Not sure

1. **Have you been diagnosed with a mental illness since the psychedelic experience?**

- Yes
- No

1. *(If Yes to Q17)* **Do you personally think that your psychedelic experience contributed towards this diagnosis?**

- Yes
- No
- Not sure

**Section 5: Beliefs About Psychedelics**

1. **Please rate your agreement with the following statement:**
   *“I believe that the insights and healings gained from psychedelics, when taken in a supportive setting, are worth the risks involved.”*

- Strongly Disagree
- Disagree
- Agree
- Strongly Agree
